# Supplementary material for: Insights into the enhanced electrochemical performance of MnV2O6 nanoflakes as an anode material for advanced lithium storage
Source: Royal Society of Chemistry journal article supplement (doi:10.1039/d2nr02565e), 2022-01-01
Supplement: d2nr02565e4.pdf [file d2nr02565e4.pdf]

## Supporting Information

### **Insights into the enhanced electrochemical performance of $\text{MnV}_2\text{O}_6$ nanoflakes as an anode for advanced lithium storage**

Ni Wen,<sup>a</sup> Siyuan Chen,<sup>a</sup> Qiuchen Lu,<sup>a</sup> Yunbo Li,<sup>a</sup> Qinghua Fan,<sup>a</sup> Quan Kuang,<sup>a</sup> Youzhong Dong<sup>a</sup> and Yanming Zhao<sup>\*a,b</sup>

<sup>a</sup>School of Physics, South China University of Technology, Guangzhou, 510640, P. R. China

<sup>b</sup>South China Institute of Collaborative Innovation, Dongguan, 523808, P. R. China

\*Corresponding authors.

E-mail addresses: zhaoym@scut.edu.cn (Y. M. Zhao).

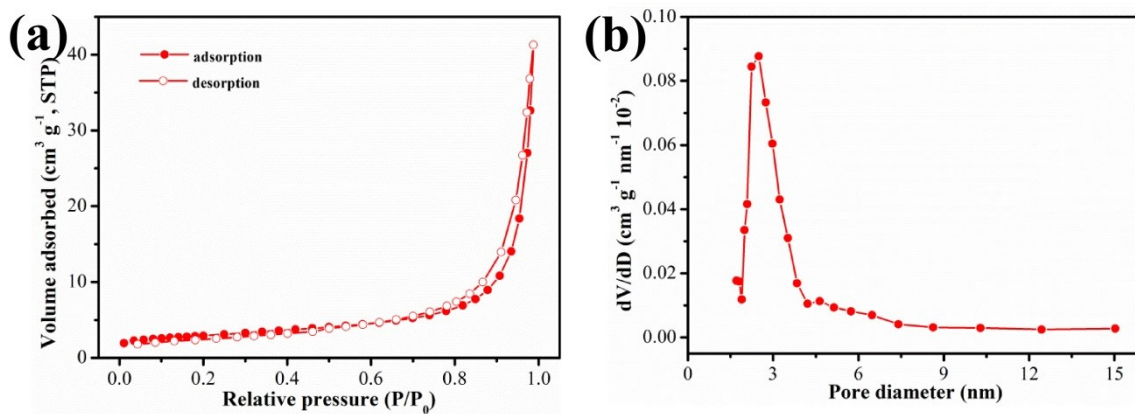

**Fig. S1** Brunauer-Emmett-Teller (BET) Analysis: (a) nitrogen adsorption-desorption isotherms. (b) BJH pore size distribution.

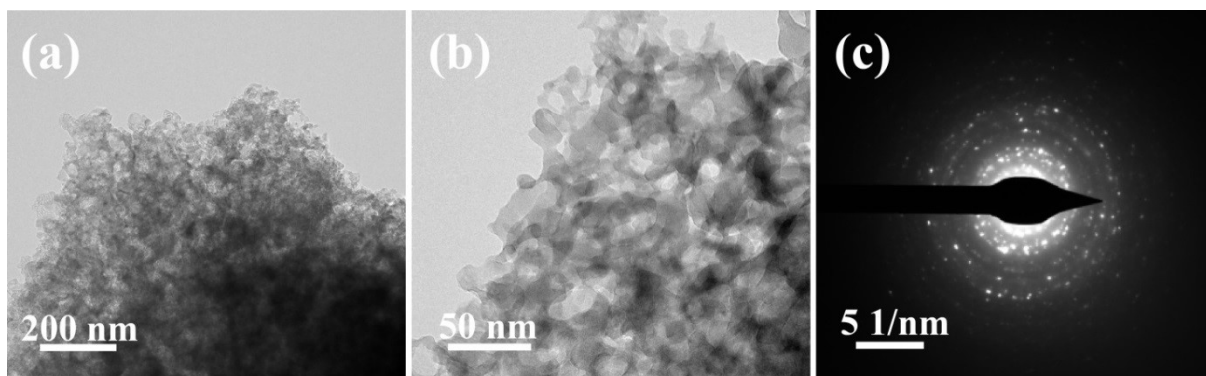

**Fig. S2** MnV<sub>2</sub>O<sub>6</sub> electrode after discharge/charge for 300 cycles at 200 mA g<sup>-1</sup>. (a, b) TEM images; (c) SAED pattern.
