# Supplementary figures and images for: Insights into the enhanced electrochemical performance of MnV2O6 nanoflakes as an anode material for advanced lithium storage
Source: Royal Society of Chemistry journal article supplement (doi:10.1039/d2nr02565e), 2022-01-01

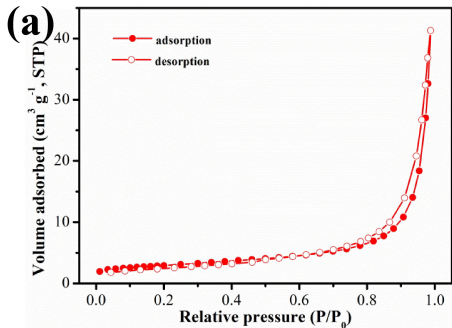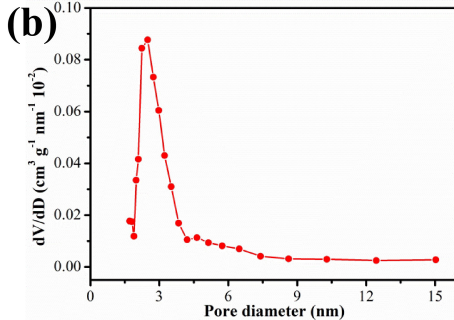

Supplement: d2nr02565e2.pdf [file d2nr02565e2.pdf]

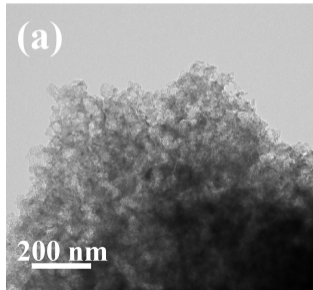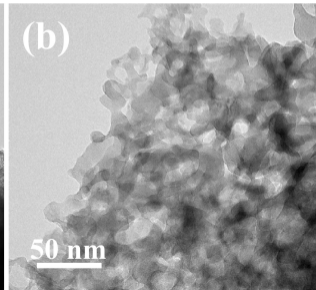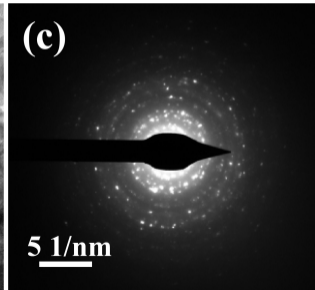

Supplement: d2nr02565e3.pdf [file d2nr02565e3.pdf]
